# Supplementary material for: Up in the Tree – The Overlooked Richness of Bryophytes and Lichens in Tree Crowns
Source: PLoS One. 2013 Dec 17;8(12):e84913. doi: 10.1371/journal.pone.0084913 (PMC3866205; doi:10.1371/journal.pone.0084913)
Supplement: Table S1 — Presence of lichen and bryophyte species separated by substrate affinity (according to Wirth et al. [38] for lichens and Nebel & Philippi [39-41] for bryophytes) and the substrate on which they occurred i) in the crown and ii) on the trunk of the sampled tree, and iii) on other substrates in the plot excluding the sampled tree. Species marked with an asterisk were only found in tree crowns. (XLSX) [file pone.0084913.s002.xlsx]

## Sheet: METHOD9
		Schwäbische Alb																																				Hainich-Dün
	Plot ID	5276				7321				18422				20965				21613				25660				30535				30591				35255				150				154				274
	Tree species	Fagus sylvatica				Fagus sylvatica				Picea abies				Picea abies				Picea abies				Fagus sylvatica				Fagus sylvatica				Fagus sylvatica				Fagus sylvatica				Fagus sylvatica				Fagus sylvatica				Picea abies
		crown	trunk	plot		crown	trunk	plot		crown	trunk	plot		crown	trunk	plot		crown	trunk	plot		crown	trunk	plot		crown	trunk	plot		crown	trunk	plot		crown	trunk	plot		crown	trunk	plot		crown	trunk	plot		crown	trunk	plot
Obligate epiphytic lichens	Substrate
Acrocordia gemmata	bark						1
Agonimia allobata	bark																															1
Anisomeridium polypori	bark			1
Arthonia didyma	bark							1																1												1
Arthonia radiata	bark						1																1	1			1	1				1				1
	fallen twigs																							1
Arthonia spadicea	bark							1															1	1								1			1	1
Arthopyrenia punctiformis	bark																							1
Candelariella reflexa	bark					1																1				1				1	1	1		1
Candelariella xanthostigma	bark					1																1	1	1						1		1		1
	fallen twigs																											1
*Catillaria nigroclavata	bark																									1
Graphis scripta	bark			1			1																1	1			1	1			1	1			1	1				1
	fallen twigs																							1
Lecania cyrtella	bark			1																						1
Lecanora argentata	bark			1		1
Lecanora chlarotera	bark	1	1	1		1	1	1										1				1	1	1		1	1	1		1	1	1		1	1	1
	fallen twigs											1												1												1
Lecanora intumescens	bark						1																											1		1
Lecanora subcarpinea	bark																							1												1
Lecanora subrugosa	bark																																			1
*Melanelixia subaurifera	bark
*Melanohalea elegantula	bark					1
*Melanohalea exasperata	bark					1																												1
Melanohalea exasperatula	bark					1												1				1				1				1				1
	fallen twigs			1								1
Opegrapha rufescens	bark																															1
Opegrapha vulgata	bark						1
Pertusaria amara	bark						1																	1								1				1
Pertusaria coronata	bark																						1	1
Pertusaria leioplaca	bark	1	1				1															1	1	1			1	1			1	1			1	1
	fallen twigs																							1
Pertusaria pertusa	bark																							1
Physcia aipolia	fallen twigs																																			1
*Physcia stellaris	bark					1																1				1								1
Porina leptalea	bark																			1
Pseudosagedia aenea	bark			1			1	1				1								1			1	1												1			1	1			1	1
*Punctelia jeckeri	bark					1																				1
*Punctelia subrudecta	bark																	1
Pyrenula nitida	bark						1																	1												1
Pyrrhospora quernea	bark																						1													1
Ramalina farinacea	bark						1																									1						1
	fallen twigs											1
Ropalospora viridis	bark						1																	1						1	1	1			1	1
Scoliciosporum chlorococcum	bark					1										1		1	1																											1
Facultative epiphytic lichens
*Amandinea punctata	bark																									1
Bacidina arnoldiana agg.	bark						1	1															1				1					1			1
Bilimbia sabuletorum	rock																							1
Buellia griseovirens	bark					1	1																	1				1		1	1	1		1	1	1
*Caloplaca holocarpa	bark																									1
Candelariella aurella	fallen twigs																											1
Chaenotheca ferruginea	bark															1
Chaenotheca stemonea	bark
Chaenotheca trichialis	bark
Cladonia coniocraea	bark			1								1			1	1															1	1
	dead wood											1				1												1
Cladonia digitata	bark
	dead wood
Cladonia fimbriata	bark											1				1
	dead wood											1				1
Cladonia ramulosa	dead wood															1
Dimerella pineti	bark		1	1			1	1			1	1			1	1			1	1			1	1			1	1				1				1			1	1			1	1			1	1
	dead wood																																															1
Evernia prunastri	bark																																	1
	fallen twigs			1
Hypocenomyce scalaris	bark
Hypogymnia physodes	bark			1		1				1								1				1								1				1												1
	fallen twigs			1				1				1				1				1								1				1				1												1
Hypogymnia tubulosa	bark					1				1								1				1												1
	fallen twigs			1								1				1												1				1				1
Lecanora carpinea	bark						1											1						1								1		1	1	1
	fallen twigs																							1				1
Lecanora conizaeoides	bark																																															1
Lecanora expallens	bark															1						1		1		1						1
Lecanora hagenii	bark					1				1																				1				1
	fallen twigs			1								1
Lecanora pulicaris	bark					1								1				1				1				1					1
	fallen twigs			1
Lecidella elaeochroma	bark			1			1																	1				1								1
Lepraria incana	bark					1		1				1			1	1		1	1	1				1				1				1						1	1	1				1			1
	dead wood							1								1				1				1								1
Lepraria lobificans	bark			1		1	1												1			1	1	1			1	1		1	1	1			1	1
	dead wood																							1				1
*Masjukiella candelaria	bark																					1
Masjukiella polycarpa	bark			1		1												1				1				1					1	1		1				1
*Masjukiella ucrainica	bark
Melanelixia glabratula	bark			1		1												1				1	1			1				1				1		1
Micarea denigrata	dead wood
Micarea prasina	bark															1
*Parmelia saxatilis	bark					1																1
Parmelia sulcata	bark			1		1				1								1				1				1				1		1		1		1		1
	fallen twigs			1				1				1												1				1								1
*Parmelina tiliacea	bark					1
Peltigera praetextata	rock																							1
*Pertusaria albescens	bark					1
Phaeophysica orbicularis	bark			1		1																		1		1		1		1	1	1		1				1
Phlyctis argena	bark	1	1	1		1	1	1				1		1								1	1	1		1	1	1		1	1	1		1	1	1
	fallen twigs																							1
Physcia adscendens	bark					1												1				1		1		1	1			1	1	1		1		1		1
	fallen twigs																											1				1				1
Physcia tenella	bark					1																1				1				1				1
Placynthiella icmalea	bark
	dead wood
Platismatia glauca	bark					1
	fallen twigs											1
Pseudevernia furfuracea	bark					1				1				1				1				1				1				1				1
	fallen twigs			1								1				1				1
Trapeliopsis flexuosa	bark
	dead wood																			1
Trapeliopsis granulosa	bark
	dead wood
*Usnea dasypoga	bark																	1
Xanthoria parietina	bark			1		1																1		1		1				1	1			1		1
Xanthoria parietina	fallen twigs																											1								1
Non-epiphytic lichens
Bagliettoa calciseda	rock																											1
Bagliettoa parmigera	rock			1				1
Cliostomum griffithii	bark																																			1
Leptogium gelatinosum	rock																							1
Petractis clausa	rock																											1
Placopyrenium fuscellum	rock			1
Porpidia soredizodes	rock
Porpidia tuberculosa	rock
Pseudosagedia chlorotica	rock
Rinodina bischoffii	rock																							1
Sarcogyne regularis	rock																							1
Thelidium incavatum	rock																							1
Verrucaria muralis	rock			1				1																1				1																1
Verrucaria nigrescens	rock							1																1				1
Not identified lichens
Micarea sp.	bark
Obligate epiphytic bryophytes
*Orthotrichum stramineum	bark																													1
Facultative epiphytic bryophytes
Amblystegium serpens	bark			1				1																																				1
	dead wood																																															1
	rock																							1
Amblystegium subtile	bark			1		1																	1	1				1				1			1
Anomodon viticulosus	rock																							1
Atrichum undulatum	bark																																										1
	soil			1								1				1																								1				1				1
Aulacomnium androgynum	bark
	dead wood																			1
	soil																			1
Brachythecium populeum	bark						1																	1
	rock																							1																				1
Brachythecium rutabulum	bark			1			1								1	1																			1	1							1	1			1
	dead wood			1				1				1				1				1				1								1				1								1				1
	soil											1				1				1								1								1								1				1
	rock			1				1																1																				1
Brachythecium salebrosum	dead wood																							1																								1
Brachythecium velutinum	bark																																															1
	dead wood							1																																								1
	soil																																															1
Bryum capillare agg.	bark																							1																				1
	soil																			1																								1				1
	rock																																											1
Ceratodon purpureus	bark
Dicranella heteromalla	soil											1								1																								1
Dicranum montanum	bark																		1					1																1				1			1	1
	dead wood																																															1
Dicranum scoparium	bark											1			1	1			1				1								1	1
	dead wood															1								1
	soil															1																																1
Dicranum tauricum	bark
	dead wood
Eurhynchium angustriete	bark															1				1
	dead wood			1								1				1				1				1																								1
	soil											1				1				1																												1
Eurhynchium hians	bark											1												1
	dead wood																							1
	soil																							1
	rock																							1
Eurhynchium praelongum	bark
	dead wood																																															1
	soil																																			1												1
Eurhynchium striatum	bark			1
	dead wood			1																				1
	soil			1																																												1
Fissidens dubius	rock							1																1
Fissidens taxifolius	soil							1												1																				1				1				1
Frullania dilatata	bark			1		1	1					1										1	1	1			1
Funaria hygrometrica	soil																																											1				1
Herzogiella seligeri	bark
	dead wood							1								1				1												1																1
Homalia trichomanoides	bark		1	1			1																								1				1
Homalothecium sericeum	bark						1
Homomallium incurvatum	rock							1
Hypnum cupressiforme	bark		1	1		1	1	1			1	1		1		1		1	1	1		1	1	1		1	1	1		1	1	1		1	1	1		1	1	1			1	1			1	1
	dead wood			1				1				1				1				1				1				1				1				1				1				1				1
	soil											1				1				1								1												1								1
	rock																							1
Isothecium alopecuroides	bark			1			1																	1							1	1				1
	dead wood			1																												1				1
	rock			1																				1
Lepidozia reptans	dead wood															1
Lophocolea bidentata	dead wood															1
	soil															1
Lophocolea heterophylla	bark			1							1	1			1	1			1	1			1									1							1	1				1			1	1
	dead wood			1								1				1				1												1												1				1
	soil
Metzgeria furcata	bark						1																1	1				1			1	1								1
	fallen twigs																															1
Mnium hornum	bark																																														1
	dead wood																							1																								1
	soil																																															1
Orthodontium lineare	bark
	dead wood
Orthotrichum affine	bark		1	1		1		1				1										1	1	1		1	1	1		1		1		1		1		1
	fallen twigs											1												1				1
*Orthotrichum diaphanum	bark
Orthotrichum lyellii	bark			1																				1												1
Orthotrichum pallens	bark					1		1																				1
Orthotrichum pumilum	bark		1	1		1						1										1	1	1		1	1	1		1		1		1		1
Orthotrichum speciosum	bark		1																			1												1
Orthotrichum striatum	bark																					1		1				1								1
Plagiochila asplenioides	soil															1				1
	rock							1
Plagiochila porelloides	rock
Plagiomnium affine	bark			1											1	1				1								1
	dead wood											1				1				1								1
	soil											1				1				1				1				1																				1
	rock			1																				1
Plagiomnium cuspidatum	rock							1
Plagiomnium undulatum	bark																			1
	dead wood															1
	soil			1								1				1				1				1												1												1
	rock
Plagiothecium cavifolium	soil																							1
Plagiothecium denticulatum	bark											1
	dead wood
	soil											1
Plagiothecium laetum	bark										1	1			1	1			1	1												1			1												1	1
	dead wood											1				1				1																												1
	soil											1								1																												1
Plagiothecium succulentum	dead wood
Plagiothecium undulatum	soil															1
Platygyrium repens	bark																																											1				1
Polytrichum formosum	bark
	dead wood															1								1
	soil															1				1				1				1																1				1
Porella platyphylla	bark						1																	1
	rock																							1
Pseudoleskeella catenulata	rock			1				1																1				1
*Pseudoleskeella nervosa	bark					1
Pterigynandrum filiforme	bark			1				1															1	1								1
Ptilidium pulcherrimum	bark
Pylaisia polyantha	bark																																							1				1
Radula complanata	bark			1		1	1	1				1											1	1			1	1		1		1
	fallen twigs																											1
Rhytidiadelphus loreus	bark															1
	dead wood															1
	soil															1				1
Rhytidiadelphus triquetrus	bark															1
	dead wood															1
	soil															1				1				1				1
Tetraphis pellucida	dead wood
Thamnobryum alopecurum	rock
Thuidium tamariscinum	bark																																															1
	dead wood																			1																												1
	soil															1				1																												1
Tortella tortuosa	rock																							1
Ulota bruchii	bark		1	1		1	1	1				1										1	1	1		1	1	1		1		1		1		1								1
	fallen twigs																							1				1																1
Ulota crispa	bark			1																		1	1	1							1	1
	fallen twigs																							1
Non-epiphytic bryophytes
Amblystegium confervoides	rock							1																																				1
Brachythecium oedipodium	soil
Bryum elegans	rock							1																1
Cirriphyllum piliferum	dead wood																							1
	soil																							1
Ctenidium molluscum	soil																			1				1
	rock			1				1																1
Dicranum polysetum	dead wood															1
	soil															1				1
Fissidens bryoides	soil																																															1
Fissidens gracilifolius	rock							1
Homalothecium lutescens	rock																							1
Hylocomium splendens	dead wood															1								1
	soil															1				1				1
	rock																							1
Hypnum jutlandicum	dead wood
	soil
Pleurozium schreberi	dead wood
	soil															1
Pohlia nutans	dead wood
	soil
Rhizomnium punctatum	dead wood							1
Rhynchostegium murale	rock							1																1
Schistidium apocarpum agg.	rock			1																				1				1
Scleropodium purum	dead wood
	soil															1				1
	rock
Seligeria pusilla	rock																							1
Not identified bryophytes
Orthotrichum sp.	bark							1
	fallen twigs							1
Ulota sp.	bark
[truncated: 54 more columns]
